# Supplementary material for: Ancillary ligand-mediated syntheses and fluorescence properties of zinc(ii) complexes based on flexible benzene dicarboxylic acid
Source: Royal Society of Chemistry journal article supplement (doi:10.1039/c0ce00873g), 2011-01-01
Supplement: c0ce00873g.pdf [file c0ce00873g.pdf]

## Supporting Information

### Ancillary ligand-mediated syntheses and fluorescence properties of zinc(II) complexes based on flexible benzene dicarboxylic acid

Guang-Zhen Liu, Ling-Yun Xin and Li-Ya Wang\*

*College of Chemistry and Chemical Engineering, Luoyang Normal University, Luoyang, Henan  
471022, P. R. China.*

*E-mail: [wlya@lynu.edu.cn](mailto:wlya@lynu.edu.cn);*

*Fax: +86-379-65511205.*

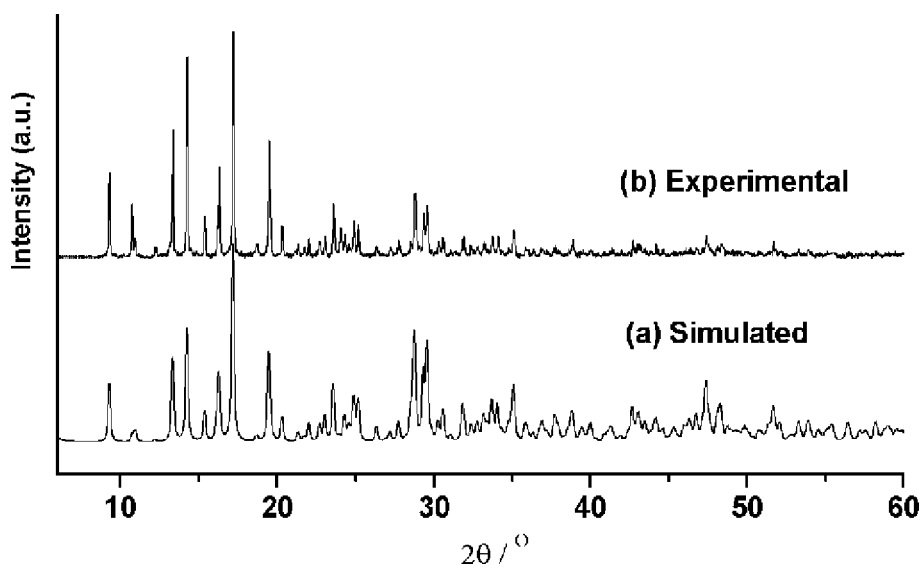

**Fig. S1** Powder X-ray diffraction patterns for **1** with (a) simulated, (b) experimental.

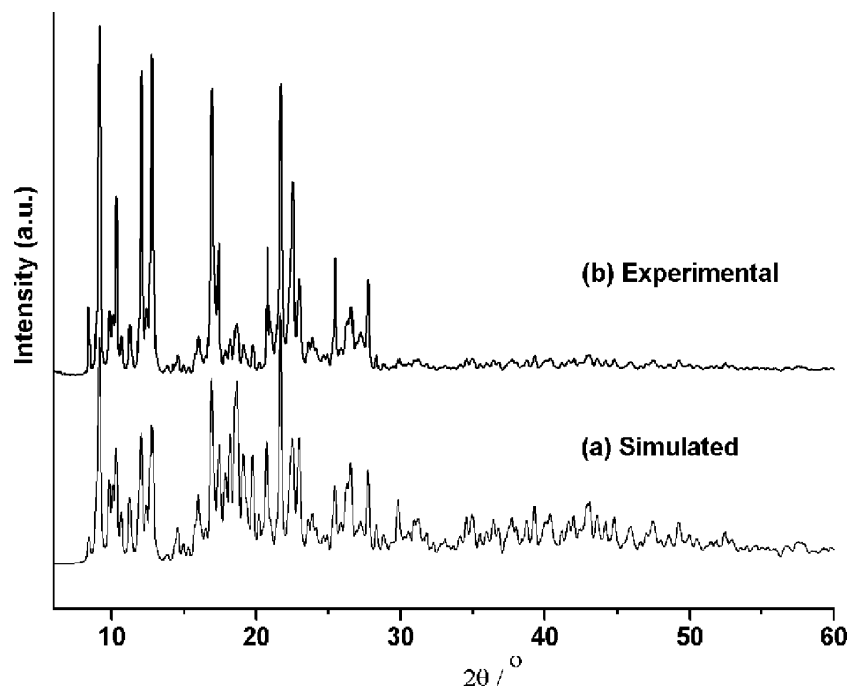

Fig. S2 Powder X-ray diffraction patterns for **2** with (a) simulated, (b) experimental.

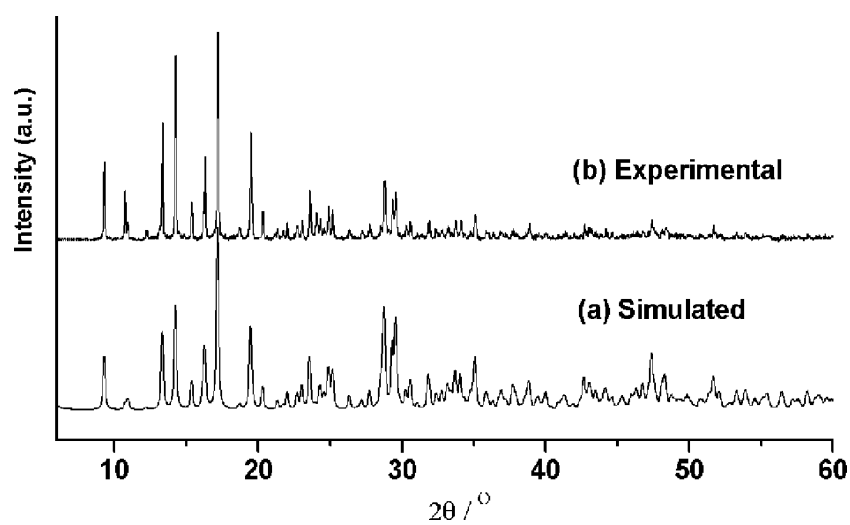

Fig. S3 Powder X-ray diffraction patterns for **3** with (a) simulated, (b) experimental.

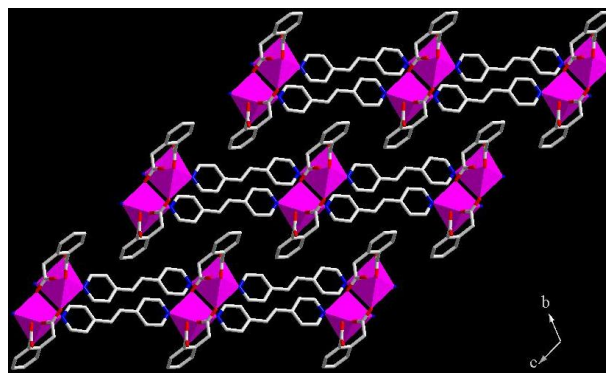

Fig. S4 View of the packing structure of **1** along the *a*-axis. ZnO<sub>4</sub>N<sub>2</sub>, purple octahedra.

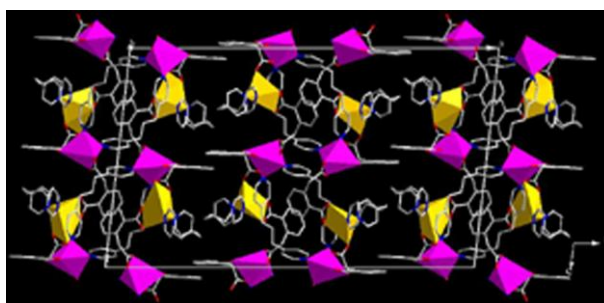

**Fig. S5** View of the packing structure of **2** along the *b*-axis.  $\text{ZnO}_3\text{N}_2$ , yellow tetragonal pyramids;  $\text{ZnO}_4\text{N}_2$ , purple octahedra.

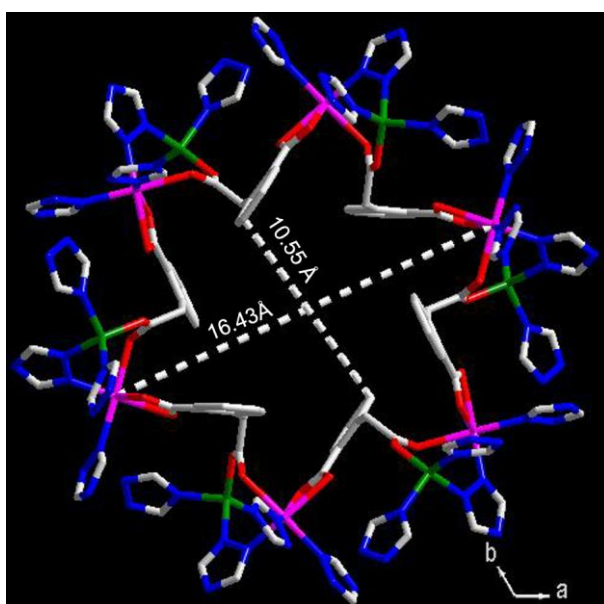

**Fig. S6** The 48-MR opening with an approximate pore diameter of  $10.55 \times 16.43 \text{ \AA}$  in **3**.

**Table S1** Selected Bond lengths ( $\text{\AA}$ ) and angles ( $^\circ$ ) for **1**<sup>a</sup>

|                     |            |                     |            |
|---------------------|------------|---------------------|------------|
| Zn(1)-O(5)#1        | 1.999(2)   | Zn(1)-N(1)          | 2.142(3)   |
| Zn(1)-O(6)#2        | 2.008(2)   | Zn(1)-N(2)#3        | 2.154(3)   |
| Zn(1)-O(1)          | 2.027(3)   |                     |            |
| O(5)#1-Zn(1)-O(6)#2 | 123.51(11) | O(1)-Zn(1)-N(1)     | 93.78(11)  |
| O(5)#1-Zn(1)-O(1)   | 98.65(11)  | O(5)#1-Zn(1)-N(2)#3 | 94.11(11)  |
| O(6)#2-Zn(1)-O(1)   | 137.83(11) | O(6)#2-Zn(1)-N(2)#3 | 89.01(11)  |
| O(5)#1-Zn(1)-N(1)   | 90.32(11)  | O(1)-Zn(1)-N(2)#3   | 89.00(11)  |
| O(6)#2-Zn(1)-N(1)   | 85.64(11)  | N(1)-Zn(1)-N(2)#3   | 174.37(10) |

<sup>a</sup> Symmetry transformations used to generate equivalent atoms: #1  $-x+1, -y+1, -z$ ; #2  $x+1, y, z$ ; #3  $x-1, y-1, z-1$ ; #4  $x+1, y+1, z+1$ ; #5  $x-1, y, z$ .

**Table S2** Selected Bond lengths (Å) and angles (°) for **2<sup>a</sup>**

|                     |            |                      |            |
|---------------------|------------|----------------------|------------|
| Zn(1)-O(7)          | 1.995(3)   | Zn(3)-N(5)           | 2.092(3)   |
| Zn(1)-O(2)          | 2.031(3)   | Zn(3)-O(14)          | 2.479(4)   |
| Zn(1)-N(2)#1        | 2.071(3)   | Zn(3)-O(10)          | 1.991(3)   |
| Zn(1)-N(1)          | 2.107(3)   | Zn(3)-O(13)          | 2.019(3)   |
| Zn(1)-O(1)          | 2.469(4)   | Zn(3)-N(6)#4         | 2.056(3)   |
| Zn(2)-O(4)#2        | 1.956(3)   | Zn(4)-O(15)          | 1.946(3)   |
| Zn(2)-O(5)          | 1.965(3)   | Zn(4)-O(11)#5        | 1.950(3)   |
| Zn(2)-N(4)#3        | 2.029(3)   | Zn(4)-N(7)           | 2.025(3)   |
| Zn(2)-N(3)          | 2.092(3)   | Zn(4)-N(8)#6         | 2.106(3)   |
| O(7)-Zn(1)-O(2)     | 111.63(12) | O(10)-Zn(3)-N(6)#4   | 103.92(12) |
| O(7)-Zn(1)-N(2)#1   | 101.55(12) | O(13)-Zn(3)-N(6)#4   | 143.18(14) |
| O(2)-Zn(1)-N(2)#1   | 144.66(12) | O(10)-Zn(3)-N(5)     | 95.38(12)  |
| O(7)-Zn(1)-N(1)     | 95.19(12)  | O(13)-Zn(3)-N(5)     | 94.69(13)  |
| O(2)-Zn(1)-N(1)     | 95.09(12)  | N(6)#4-Zn(3)-N(5)    | 94.62(12)  |
| N(2)#1-Zn(1)-N(1)   | 93.67(12)  | O(10)-Zn(3)-O(14)    | 158.41(12) |
| O(7)-Zn(1)-O(1)     | 159.96(11) | O(13)-Zn(3)-O(14)    | 54.91(13)  |
| O(2)-Zn(1)-O(1)     | 55.95(11)  | N(6)#4-Zn(3)-O(14)   | 88.32(11)  |
| N(2)#1-Zn(1)-O(1)   | 88.76(11)  | N(5)-Zn(3)-O(14)     | 101.37(12) |
| N(1)-Zn(1)-O(1)     | 101.31(11) | O(10)-Zn(3)-C(61)    | 136.64(15) |
| O(4)#2-Zn(2)-O(5)   | 106.48(12) | O(13)-Zn(3)-C(61)    | 27.07(15)  |
| O(4)#2-Zn(2)-N(4)#3 | 129.87(13) | N(6)#4-Zn(3)-C(61)   | 116.29(15) |
| O(5)-Zn(2)-N(4)#3   | 106.96(12) | N(5)-Zn(3)-C(61)     | 96.82(15)  |
| O(4)#2-Zn(2)-N(3)   | 109.94(11) | O(14)-Zn(3)-C(61)    | 28.00(14)  |
| O(5)-Zn(2)-N(3)     | 94.17(12)  | O(15)-Zn(4)-O(11)#5  | 108.97(11) |
| N(4)#3-Zn(2)-N(3)   | 103.68(13) | O(15)-Zn(4)-N(7)     | 128.09(12) |
| O(4)#2-Zn(2)-C(9)#2 | 28.80(11)  | O(11)#5-Zn(4)-N(7)   | 106.55(12) |
| O(5)-Zn(2)-C(9)#2   | 134.92(13) | O(15)-Zn(4)-N(8)#6   | 110.06(12) |
| N(4)#3-Zn(2)-C(9)#2 | 111.43(13) | O(11)#5-Zn(4)-N(8)#6 | 92.97(12)  |
| N(3)-Zn(2)-C(9)#2   | 98.79(12)  | N(7)-Zn(4)-N(8)#6    | 104.52(12) |
| O(10)-Zn(3)-O(13)   | 110.54(14) |                      |            |

<sup>a</sup> Symmetry transformations used to generate equivalent atoms: #1 -x+1, y+1/2, -z+1/2; #2 x, -y+3/2, z+1/2; #3 x, y-1, z; #4 -x, y-1/2, -z+3/2; #5 x, -y+1/2, z-1/2; #6 x, y+1, z; #7 x, -y+3/2, z-1/2; #8 x, -y+1/2, z+1/2; #9 -x+1, y-1/2, -z+1/2; #10 -x, y+1/2, -z+3/2.

**Table S3** Selected Bond lengths (Å) and angles (°) for **3<sup>a</sup>**

|                     |            |                     |            |
|---------------------|------------|---------------------|------------|
| Zn(1)-N(4)#1        | 2.022(3)   | Zn(1)-O(2)#2        | 2.401(4)   |
| Zn(1)-O(1)#2        | 2.028(3)   | Zn(2)-O(3)          | 1.925(3)   |
| Zn(1)-N(2)          | 2.069(3)   | Zn(2)-N(6)          | 1.991(3)   |
| Zn(1)-N(5)#3        | 2.144(3)   | Zn(2)-N(3)#4        | 2.030(3)   |
| Zn(1)-O(4)          | 2.319(3)   | Zn(2)-N(1)          | 2.035(3)   |
|                     |            |                     |            |
| N(4)#1-Zn(1)-O(1)#2 | 152.12(13) | O(4)-Zn(1)-O(2)#2   | 93.74(13)  |
| N(4)#1-Zn(1)-N(2)   | 101.80(11) | N(4)#1-Zn(1)-C(7)#2 | 124.52(14) |
| O(1)#2-Zn(1)-N(2)   | 102.62(12) | O(1)#2-Zn(1)-C(7)#2 | 29.59(13)  |
| N(4)#1-Zn(1)-N(5)#3 | 103.14(11) | N(2)-Zn(1)-C(7)#2   | 132.21(13) |
| O(1)#2-Zn(1)-N(5)#3 | 90.23(11)  | N(5)#3-Zn(1)-C(7)#2 | 90.48(12)  |
| N(2)-Zn(1)-N(5)#3   | 89.75(12)  | O(4)-Zn(1)-C(7)#2   | 87.36(12)  |
| N(4)#1-Zn(1)-O(4)   | 84.57(10)  | O(2)#2-Zn(1)-C(7)#2 | 28.80(12)  |
| O(1)#2-Zn(1)-O(4)   | 83.98(11)  | O(3)-Zn(2)-N(6)     | 120.36(12) |
| N(2)-Zn(1)-O(4)     | 85.85(11)  | O(3)-Zn(2)-N(3)#4   | 101.30(12) |
| N(5)#3-Zn(1)-O(4)   | 171.79(10) | N(6)-Zn(2)-N(3)#4   | 105.29(12) |
| N(4)#1-Zn(1)-O(2)#2 | 97.26(11)  | O(3)-Zn(2)-N(1)     | 120.09(11) |
| O(1)#2-Zn(1)-O(2)#2 | 58.32(11)  | N(6)-Zn(2)-N(1)     | 104.71(12) |
| N(2)-Zn(1)-O(2)#2   | 160.80(11) | N(3)#4-Zn(2)-N(1)   | 102.53(13) |
| N(5)#3-Zn(1)-O(2)#2 | 88.14(13)  |                     |            |

<sup>a</sup> Symmetry transformations used to generate equivalent atoms: #1 x, y, z+1; #2 x-y, x-1, -z+2; #3 -x+5/3, -y+1/3, -z+4/3; #4 -y+4/3, x-y-1/3, z-1/3; #5 y+1, -x+y+1, -z+2; #6 -x+y+5/3, -x+4/3, z+1/3; #7 x, y, z-1.
